# Supplementary material
Source: PubMed Central journal article supplement (PMC4443328)
Supplement: pnas.201505531SI.pdf [file pnas.201505531SI.pdf]

# Supporting Information

Zhang et al. 10.1073/pnas.1505531112

## SI Materials and Methods

**Ncd Protein Expression and Purification.** The Ncd pET/MC1 plasmid (1, 2) was a generous gift of Sharyn A. Endow (Duke University Medical Center, Durham, NC) and was expressed in *E. coli* BL21-CodonPlus (DE3)-RIL cell line (Stratagene) for purification as described previously (2, 3). Cells were grown in lysogeny broth (LB) with antibiotics (75  $\mu\text{g}/\text{mL}$  ampicillin, 10  $\mu\text{g}/\text{mL}$  chloramphenicol) at 37 °C until  $A_{600}$  was  $\sim 0.4$ , and then the cells were cooled on ice to 16 °C, followed by induction with 75  $\mu\text{M}$  isopropyl  $\beta$ -D-1-thiogalactopyranoside. Protein expression was continued for 16 h at 16 °C with shaking, followed by centrifugation. The cell pellets were resuspended in lysis buffer (10 mM sodium phosphate buffer, pH 7.2, 30 mM NaCl, 5 mM  $\text{MgCl}_2$ , 1 mM EGTA, 1 mM EDTA, 10 mM phenylmethylsulfonyl fluoride, 1 mM DTT, and 0.02 mM ATP) at 10 mL/g wet weight, and adjusted to 0.1 mg/mL lysozyme. The cells were incubated for 45 min at 4 °C with gentle stirring. Following three cycles of freezing (liquid  $\text{N}_2$ ) and thawing (37 °C), the lysates were clarified by ultracentrifugation. The supernatant was loaded onto a SP Sepharose column (HiTrap SP FF; GE Healthcare Life Sciences) that was preequilibrated in SP Sepharose binding buffer (10 mM sodium phosphate buffer, pH 7.2, 30 mM NaCl, 5 mM  $\text{MgCl}_2$ , 0.1 mM EGTA, 0.1 mM EDTA, 1 mM DTT, 0.02 mM ATP). After washing with the binding buffer, the proteins were eluted from the column with a linear gradient of 30–600 mM NaCl in Sepharose binding buffer. Fractions containing Ncd MC1 were identified by SDS/PAGE, pooled, and dialyzed against diethylaminoethyl (DEAE) column binding buffer (10 mM sodium phosphate buffer, pH 7.2, 30 mM NaCl, 2 mM  $\text{MgCl}_2$ , 0.1 mM EGTA, 0.1 mM EDTA, 1 mM DTT, 0.02 mM ATP). The dialyzed proteins were loaded onto a preequilibrated DEAE column (HiTrap DEAE FF; GE Healthcare) and the column was washed with DEAE column binding buffer, followed by protein elution with a linear gradient of 30–400 mM NaCl in the DEAE column binding buffer. Fractions enriched in Ncd MC1 were identified by SDS/PAGE, pooled, and dialyzed in 20 mM Hepes, pH 7.2, with KOH, 0.1 mM EDTA, 0.1 mM EGTA, 5 mM magnesium acetate, 50 mM potassium acetate, 1 mM DTT, and 100 mM NaCl. The dialyzed protein was clarified and then concentrated by ultrafiltration, followed by loading onto an HPLC gel filtration column (Superose 10/300 GL; GE Healthcare) using a Beckman Coulter System Gold HPLC. The eluted homodimeric Ncd was collected and dialyzed against ATPase buffer: 20 mM Hepes, pH 7.2 with KOH, 0.1 mM EDTA, 0.1 mM EGTA, 5 mM magnesium acetate, 50 mM potassium acetate, 1 mM DTT, plus 5% sucrose. The dialyzed protein was clarified by ultracentrifugation, frozen as aliquots in liquid  $\text{N}_2$ , and stored at  $-80$  °C. A single Ncd MC1 polypeptide contains the N-terminal 11 amino acid residues of bacteriophage T7 S10 protein (MASMTGGQQMG), two linker residues (RD), and the C-terminal 492 residues of Ncd, corresponding to amino acid sequence Leu<sup>209</sup>–Lys<sup>700</sup>. The predicted molecular weight based on amino acid sequence is 57,363 per polypeptide chain and 114,726 for the MC1 homodimer. Before each experiment, Ncd was clarified for 10 min at 4 °C (Beckman Coulter TLX ultracentrifuge, TLA-100 rotor, 313,000  $\times$  g), and the protein concentration was determined using the Bio-Rad protein assay with IgG as a protein standard. MT concentrations are reported as paclitaxel-stabilized tubulin polymer.

**Pulse-Chase Kinetics of ATP Binding.** To measure the kinetics of ATP binding (Fig. S2), the MT•Ncd complex (10  $\mu\text{M}$  Ncd•ADP/30  $\mu\text{M}$  MTs or 16  $\mu\text{M}$  Ncd•ADP/30  $\mu\text{M}$  MTs, syringe concen-

trations) was preformed and rapidly mixed in a chemical quench-flow instrument (RQF-3; KinTek Corp.) with MgATP plus trace [ $\alpha$ -<sup>32</sup>P]ATP and 200 mM KCl (syringe concentrations) from 5 to 400 ms (4–6). The reaction mixture was subsequently chased with 30 mM nonradiolabeled MgATP (syringe concentration) for 6 s ( $>10$  ATP turnovers) and expelled from the instrument into a 1.5-mL tube containing 100  $\mu\text{L}$  of 22 N formic acid. The acid terminated the reaction and released any nucleotide at the active site. The time of the chase allowed stably bound [ $\alpha$ -<sup>32</sup>P]ATP to be converted to [ $\alpha$ -<sup>32</sup>P]ADP•P<sub>i</sub>, yet any [ $\alpha$ -<sup>32</sup>P]ATP unbound or bound loosely to the active site was diluted by the high concentration of nonradiolabeled ATP. One microliter of each reaction mixture was spotted onto a PEI-cellulose TLC plate (EMD Millipore) and developed with 0.6 M potassium phosphate buffer, pH 3.4, to separate [ $\alpha$ -<sup>32</sup>P]ATP from [ $\alpha$ -<sup>32</sup>P]ADP + P<sub>i</sub>. The radiolabeled nucleotide was quantified using Image Gauge v4 software (FUJIFILM Science Laboratory). The concentration of [ $\alpha$ -<sup>32</sup>P]ADP product was plotted as a function of time, and the pre-steady-state burst equation (Eq. S1) was fit to each transient:

$$[\text{ADP}] = A_0[1 - \exp(-k_b t)] + k_{\text{slow}} t, \quad \text{[S1]}$$

where  $A_0$  is the amplitude of the exponential burst phase, representing the stable formation of [ $\alpha$ -<sup>32</sup>P]ATP•motor complex that proceeded through ATP hydrolysis during the first ATP turnover,  $k_b$  is the observed rate of the exponential burst phase, and  $t$  is the time in seconds. The  $k_{\text{slow}}$  is the rate constant of the linear phase ( $\mu\text{M}\cdot\text{s}^{-1}$ ) and, when divided by the Ncd site concentration, corresponds to steady-state turnover. The observed exponential rates of each transient were plotted as a function of MgATP concentration, and Eq. S2 was fit to the data:

$$k_{\text{obs}} = [K_1 k'_{+1} [\text{ATP}] / (K_1 [\text{ATP}] + 1)], \quad \text{[S2]}$$

where  $K_1$  represents the equilibrium association constant for formation of the collision complex ( $K_d = 1/K_1$ ), and  $k'_{+1}$  represents the first-order rate constant for the ATP-promoted isomerization to form the intermediate poised for ATP hydrolysis. The amplitude of each transient was plotted as a function of MgATP concentration, and the hyperbolic fit to the data provided the maximum amplitude, which can be related to the Ncd active sites in the experiment.

**Acid-Quench Kinetics of ATP Hydrolysis.** The pre-steady-state kinetic experiments to determine the time course of ATP hydrolysis were performed with a KinTek chemical quench-flow instrument. The MT•Ncd complex (10  $\mu\text{M}$  Ncd•ADP/30  $\mu\text{M}$  MTs, 16  $\mu\text{M}$  Ncd•ADP/30  $\mu\text{M}$  MTs, or 20  $\mu\text{M}$  Ncd•ADP/30  $\mu\text{M}$  MTs, syringe concentrations) was rapidly mixed with MgATP plus trace [ $\alpha$ -<sup>32</sup>P]ATP and 200 mM KCl (syringe concentrations) for times ranging from 5 to 400 ms. The reaction mixture was quenched with 22 N formic acid (syringe concentration), which terminated the reaction and released any nucleotide at the active site. The radiolabeled products [ $\alpha$ -<sup>32</sup>P]ADP and P<sub>i</sub> were separated from [ $\alpha$ -<sup>32</sup>P]ATP by TLC and quantified using Image Gauge v4 software (FUJIFILM Science Laboratory). The concentration of product was plotted as a function of time, and Eq. S1 was fit to the data, where  $A_0$  is the amplitude of the exponential burst phase, representing the formation of [ $\alpha$ -<sup>32</sup>P]ADP•P<sub>i</sub> at the active site during the first ATP turnover,  $k_b$  is the rate of the exponential burst phase, and  $t$  is the time in seconds. The constant

$k_{\text{slow}}$  is the rate of the linear phase and, when divided by the Ncd site concentration, corresponds to steady-state turnover. The observed rate and amplitude of the exponential burst phase of each transient were plotted as a function of MgATP concentration, and a hyperbolic function was fit to each data set, providing the rate constant of ATP hydrolysis and the maximum amplitude of the exponential phase.

**MT•Ncd Cosedimentation Assays.** To determine the concentration of Ncd bound to the MTs in the preformed MT•Ncd complex for the pulse-chase (Fig. S2) and acid-quench (Fig. S3) experiments, equilibrium cosedimentation experiments were performed (3, 7). Reactions of 200  $\mu\text{L}$  with MTs were formed at 8  $\mu\text{M}$  Ncd•ADP/15  $\mu\text{M}$  MTs or 16  $\mu\text{M}$  Ncd•ADP/30  $\mu\text{M}$  MTs in ATPase buffer plus 40  $\mu\text{M}$  paclitaxel and incubated at room temperature for 30 min followed by centrifugation at 25  $^{\circ}\text{C}$  (Beckman Coulter TLX ultracentrifuge, TLA-100 rotor, 313,000  $\times$  g, 30 min). For each reaction, the supernatant was collected (top 100  $\mu\text{L}$  of 200  $\mu\text{L}$  with remaining 100  $\mu\text{L}$  discarded). The MT pellet was resuspended in 100  $\mu\text{L}$  of 5 mM  $\text{CaCl}_2$  in buffer and incubated at 4  $^{\circ}\text{C}$  for 10 min. This step was repeated, and the two 100  $\mu\text{L}$   $\text{CaCl}_2$  aliquots were combined. Laemmli 2 $\times$  sample buffer was added to the supernatant (100  $\mu\text{L}$  + 100  $\mu\text{L}$  sample buffer) and resuspended pellet (200  $\mu\text{L}$  + 200  $\mu\text{L}$  sample buffer) for each reaction pair, followed by analysis by SDS/PAGE, in which the supernatant and pellet samples were loaded as equal volumes. The 8% acrylamide/2 M urea Coomassie Brilliant Blue R-250 stained gels were analyzed and quantified by Image Gauge v4 software.

**MantATP Binding Following MT•Ncd Association.** To mimic the reaction condition at the beginning of the cycle, 10  $\mu\text{M}$  Ncd•ADP was rapidly mixed with 40  $\mu\text{M}$  MTs plus varying concentrations of mantATP in the SF-2003 KinTek stopped-flow instrument (Fig. 2). Final concentrations: 5  $\mu\text{M}$  Ncd•ADP sites, 20  $\mu\text{M}$  MTs, and 0–15  $\mu\text{M}$  mantATP (Invitrogen). The change in fluorescence of mantATP was monitored by excitation at 360 nm with detection at 450 nm using a 409-nm long-pass filter (Semrock, Inc.). The fluorescence of mantATP as well as mantADP is enhanced by the hydrophobic environment of the active site. A single exponential function was fit to each transient, and the observed rates obtained were plotted as a function of mantATP concentration. A hyperbolic function plus a y-intercept was fit to the data, providing the maximum rate constant of mantATP binding.

**MantADP Release Kinetics from Head 1 and 2.** The Ncd•mantADP complex (4  $\mu\text{M}$  Ncd sites/8  $\mu\text{M}$  mantADP) was rapidly mixed in the stopped-flow instrument with varying MT concentrations plus 1 mM MgATP. Final concentrations: 2  $\mu\text{M}$  Ncd sites, 4  $\mu\text{M}$  mantADP, 2–20  $\mu\text{M}$  MTs, and 500  $\mu\text{M}$  MgATP. The data were collected at a 2-s time domain to optimize capturing both the initial fast phase as well as the subsequent slow phase. Each transient (Fig. S4A) was fit to a double-exponential function. The observed rates for both the initial fast exponential phase and subsequent slow phase were each plotted as a function of ATP concentration (Fig. S4B). The hyperbolic fit to each provided the maximum rate constant of mantADP release from the first Ncd head to collide with the MT and the maximum rate constant associated with the second head's MT collision event and subsequent mantADP release.

**Pre-Steady-State Kinetics of Phosphate Release.** The kinetics of  $\text{P}_i$  release were determined using the *E. coli* phosphate-binding protein (PBP) that was developed as a  $\text{P}_i$  biosensor by introduction of a single cysteine into PBP at position 197 (A197C) and selectively

labeled with the fluorophore MDCC (8, 9). The probe was excited at 436 nm with fluorescence emission at 474 nm detected via a 450-nm long-pass filter (Semrock, Inc.) in the stopped-flow instrument. MDCC-PBP binds phosphate rapidly ( $\sim 136 \mu\text{M}^{-1}\text{s}^{-1}$ ) and tightly ( $K_d \sim 0.1 \mu\text{M}$ ), resulting in a fluorescence enhancement of approximately sevenfold that can be quantified (8–11). To remove free phosphate from the solutions and stopped-flow chamber, a “ $\text{P}_i$  mop” containing bacterial purine nucleoside phosphorylase (PNPase) and 7-methylguanosine (MEG) was used to sequester contaminating free phosphate as ribose-1-phosphate. The concentrations of MEG and PNPase were adjusted to 75  $\mu\text{M}$  MEG and 0.025 U/mL PNPase in each syringe to achieve a rate of phosphate removal at 0.002  $\text{s}^{-1}$  to prevent the Mop reaction from competing with MDCC-PBP.

To convert the MDCC-PBP fluorescence amplitude of each transient in volts into units of  $\text{P}_i$  concentration, a phosphate standard curve was used. MDCC-PBP in ATPase buffer with added 0.02 U/mL PNPase and 150  $\mu\text{M}$  MEG (syringe concentrations) was rapidly mixed in the stopped-flow instrument with varying concentrations of  $\text{KH}_2\text{PO}_4$ . The initial exponential amplitude of each  $\text{KH}_2\text{PO}_4$  transient in volts was plotted as a function of phosphate concentration to obtain a linear fit of the data. The phosphate-calibration curve was then used to convert the amplitude of each transient in Fig. 3 to units of concentration to relate to the total number of ATP hydrolysis and phosphate release events per Ncd site concentration in the experiment. The phosphate standard curve is performed with each experiment at the concentration of MDCC-PBP used to measure phosphate release from the MT•motor complex.

**Parameter Estimation Method.** The parameter estimation problem for the dynamic model of the Ncd powerstroke process (Fig. 4) can be mathematically formulated as follows:

$$\begin{aligned} & \min_{\mathbf{P}} \sum_i \sum_k (F_{ik} - \hat{F}_{ik})^2 \\ & \dot{X}_1 = -k_1 X_1 + k_{-1} X_2 \\ & \dot{X}_2 = k_1 X_1 - k_{-1} X_2 - k_2 X_2 M + k_{-2} X_3 \\ & \dot{X}_3 = k_2 X_2 M - k_{-2} X_3 - k_3 X_3 \\ & \text{s.t. } \dot{X}_4 = k_3 X_3 - k_4 X_4 M \\ & \dot{X}_5 = k_4 X_4 M \\ & \dot{M} = -k_2 X_2 M + k_{-2} X_3 - k_4 X_4 M \\ & F = \lambda_1 X_3 + \lambda_2 X_4 + \lambda_3 X_5 \\ & \mathbf{P} = [k_1, k_{-1}, k_2, k_{-2}, k_3, k_4, \lambda_1, \lambda_2, \lambda_3]^T, p_j \geq 0 \forall j = 1, 2, \dots, 9. \end{aligned}$$

Here,  $F_{ik}$  and  $\hat{F}_{ik}$  are the simulated and measured fluorescence at the  $k$ th sampling time under the  $i$ th experimental condition. Parameters  $p$  include  $k_1, k_{-1}, k_2, k_{-2}, k_3, k_4, \lambda_1, \lambda_2,$  and  $\lambda_3$ . The sampling times  $t_k$  are at 0.3, 0.5, 0.7, 0.9, 1.1, 1.3, 1.5, 1.6, 1.7, 1.8, 1.9, and 2.0 s. Data used for estimation were obtained from the mantATP binding experiments (Fig. 2), which were conducted at different initial concentrations of mantATP in the range of 0.5, 1.5, 2.5, 3.5, and 4.5  $\mu\text{M}$ .

The parameter estimation problem is solved by applying an optimization algorithm that requires repeated evaluation of the objective function and its gradients by numerical integration of the ordinary differential equations (ODEs). In this work, *fmincon* (a MATLAB function) is used as the nonlinear programming (NLP) solver, and *ode45* (a MATLAB function) is used as the ODE solver.

1. Chandra R, Endow SA, Salmon ED (1993) An N-terminal truncation of the Ncd motor protein supports diffusional movement of microtubules in motility assays. *J Cell Sci* 104(Pt 3):899–906.
2. Chandra R, Salmon ED, Erickson HP, Lockhart A, Endow SA (1993) Structural and functional domains of the *Drosophila* Ncd microtubule motor protein. *J Biol Chem* 268(12):9005–9013.
3. Foster KA, Correia JJ, Gilbert SP (1998) Equilibrium binding studies of non-claret disjunctional protein (Ncd) reveal cooperative interactions between the motor domains. *J Biol Chem* 273(52):35307–35318.
4. Foster KA, Gilbert SP (2000) Kinetic studies of dimeric Ncd: Evidence that Ncd is not processive. *Biochemistry* 39(7):1784–1791.
5. Foster KA, Mackey AT, Gilbert SP (2001) A mechanistic model for Ncd directionality. *J Biol Chem* 276(22):19259–19266.
6. Gilbert SP, Mackey AT (2000) Kinetics: A tool to study molecular motors. *Methods* 22(4):337–354.
7. Chen CJ, Rayment I, Gilbert SP (2011) Kinesin Kar3Cik1 ATPase pathway for microtubule cross-linking. *J Biol Chem* 286(33):29261–29272.
8. Brune M, Hunter JL, Corrie JE, Webb MR (1994) Direct, real-time measurement of rapid inorganic phosphate release using a novel fluorescent probe and its application to actomyosin subfragment 1 ATPase. *Biochemistry* 33(27):8262–8271.
9. Brune M, et al. (1998) Mechanism of inorganic phosphate interaction with phosphate binding protein from *Escherichia coli*. *Biochemistry* 37(29):10370–10380.
10. Gilbert SP, Webb MR, Brune M, Johnson KA (1995) Pathway of processive ATP hydrolysis by kinesin. *Nature* 373(6516):671–676.
11. Klumpp LM, Hoenger A, Gilbert SP (2004) Kinesin's second step. *Proc Natl Acad Sci USA* 101(10):3444–3449.



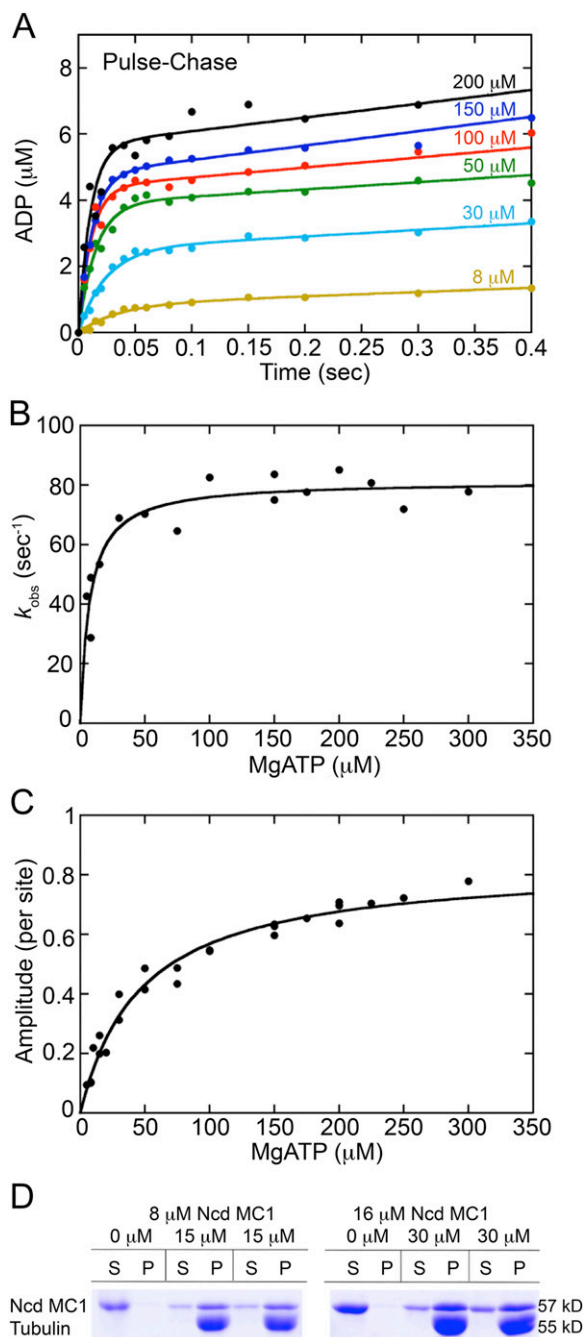

**Fig. S2.** Pulse-chase kinetics of ATP binding. The MT•Ncd complex was rapidly mixed in the chemical quench-flow instrument with increasing concentrations of MgATP + trace [ $\alpha$ - $^{32}\text{P}$ ]ATP and 200 mM KCl, followed by a chase with 30 mM unlabeled MgATP (syringe concentrations). Final concentrations: 5  $\mu\text{M}$  Ncd•ADP/15  $\mu\text{M}$  MTs or 8  $\mu\text{M}$  Ncd•ADP/15  $\mu\text{M}$  MTs, 0–300  $\mu\text{M}$  [ $\alpha$ - $^{32}\text{P}$ ]ATP, and 100 mM KCl. (A) Representative transients for ATP binding show an initial exponential formation of [ $\alpha$ - $^{32}\text{P}$ ]ADP•P<sub>i</sub> during the first ATP turnover followed by a linear phase of product formation representing subsequent ATP turnovers. Final MT•Ncd complex concentrations: 8  $\mu\text{M}$  Ncd•ADP/15  $\mu\text{M}$  MTs. (B) The observed rates of the pre-steady-state exponential phase determined for individual transients were plotted as a function of MgATP concentration, and the Eq. S2 fit provided the maximum  $k_b = 81.3 \pm 2.6 \text{ s}^{-1}$  and  $K_{d,\text{ATP}} = 7.1 \pm 0.03 \mu\text{M}$ . (C) The amplitude of each exponential phase was normalized to the concentration of Ncd sites and plotted as a function of MgATP concentration. A hyperbolic fit to the data provided the maximum burst amplitude of  $0.84 \pm 0.03 \mu\text{M}$  ADP•P<sub>i</sub> per site and  $K_{d,\text{ATP}} = 47 \pm 5.2 \mu\text{M}$ . The data in B and C represent multiple experiments. (D) The MT•Ncd complex used in the pulse-chase experiments was evaluated by cosedimentation assays. The supernatant (S) and pellet (P) for each reaction are shown with the concentration of MTs indicated above each pair. Approximately 80% of the total Ncd pelleted with MTs at the conditions of the pulse-chase experiments, indicating that all MT-associated Ncd motor heads did bind and hydrolyze ATP during the first ATP turnover.

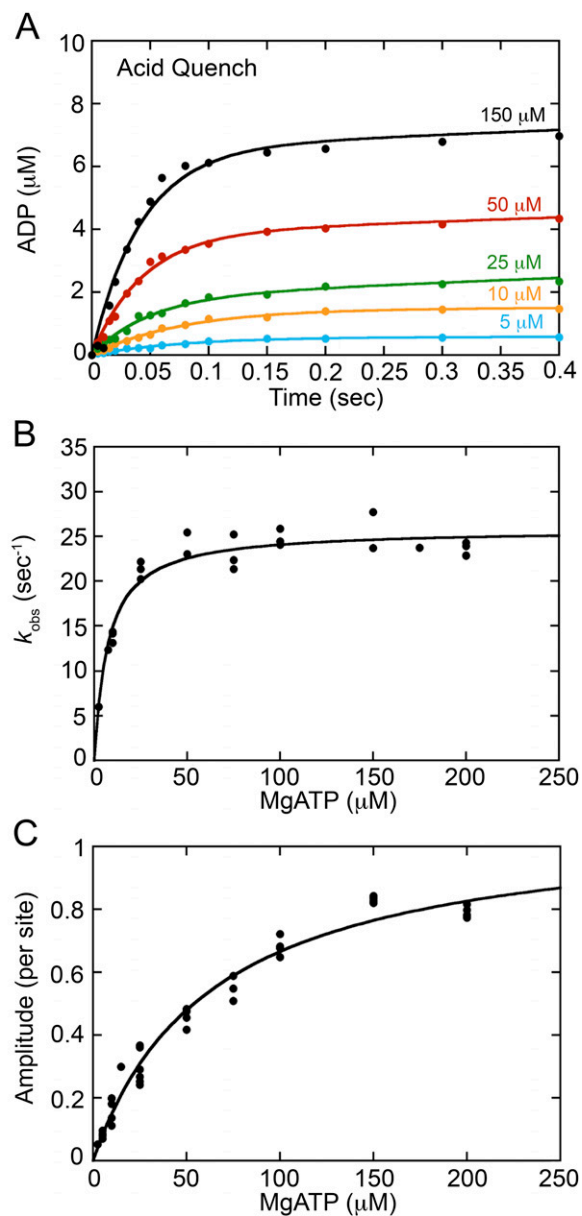

**Fig. S3.** Acid-quench kinetics of ATP hydrolysis. The preformed MT•Ncd complex was rapidly mixed in the chemical quench-flow instrument with increasing concentrations of MgATP + trace [ $\alpha$ - $^{32}\text{P}$ ]ATP and 200 mM KCl (syringe concentrations). Final concentrations: 5  $\mu\text{M}$  Ncd•ADP/15  $\mu\text{M}$  MTs, 8  $\mu\text{M}$  Ncd•ADP/15  $\mu\text{M}$  MTs, or 10  $\mu\text{M}$  Ncd•ADP/15  $\mu\text{M}$  MTs, 0–300  $\mu\text{M}$  [ $\alpha$ - $^{32}\text{P}$ ]ATP, and 100 mM KCl. (A) Representative transients show an initial exponential phase of [ $\alpha$ - $^{32}\text{P}$ ]ADP•P<sub>i</sub> during the first ATP turnover followed by a linear phase of product formation representing subsequent ATP turnovers. Final MT•Ncd complex concentrations: 8  $\mu\text{M}$  Ncd•ADP/15  $\mu\text{M}$  MTs. (B) The observed rates of the presteady-state exponential phase determined for individual transients were plotted as a function of MgATP concentration, and the hyperbolic fit to the data provided the maximum  $k_b = 26 \pm 0.6 \text{ s}^{-1}$  and  $K_{d,\text{ATP}} = 7.2 \pm 0.9 \mu\text{M}$ . At high ATP concentrations, ATP hydrolysis becomes rate-limiting; therefore, the maximum  $k_b$  represents the rate constant for ATP hydrolysis. (C) The amplitude of the exponential phase for each transient was normalized to the concentration of Ncd sites and plotted as a function of MgATP concentration. The hyperbolic fit to the data provided  $A_{\text{max}} = 1.09 \pm 0.04 \mu\text{M}$  ADP•P<sub>i</sub> per site and  $K_{d,\text{ATP}} = 63.7 \pm 6 \mu\text{M}$ . The acid-quench amplitude data also support the argument that all MT-associated Ncd motor heads did bind and hydrolyze ATP during the first ATP turnover.

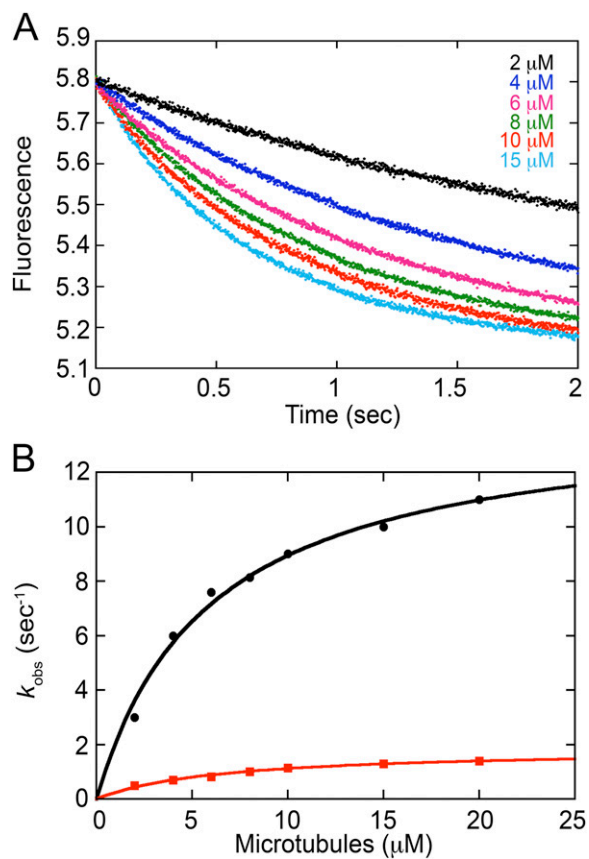

**Fig. 54.** MantADP release kinetics from Ncd heads 1 and 2. The Ncd•mantADP complex (4  $\mu\text{M}$  Ncd sites/8  $\mu\text{M}$  mantADP) was rapidly mixed in the stopped-flow instrument with increasing concentrations of MTs plus 1 mM MgATP. Final concentrations: 2  $\mu\text{M}$  Ncd sites/4  $\mu\text{M}$  mantADP, 2–20  $\mu\text{M}$  MTs, and 500  $\mu\text{M}$  MgATP. (A) Representative transients are biphasic with an initial rapid phase of fluorescence quenching followed by a slow phase. Each transient was fit to a double-exponential function, which provided the observed rates of mantADP release from each exponential phase. (B) The observed rates for the initial fast phase of mantADP release associated with the first head that collides with the MT and the subsequent slow phase of mantADP release associated with the second head that collides with the MT were plotted as a function of MT concentration. The hyperbolic fit of each data set provided a maximum rate constant for the fast phase at  $14.2 \pm 0.7 \text{ s}^{-1}$  and the slow phase at  $1.85 \pm 0.1 \text{ s}^{-1}$ . The amplitudes associated with each phase were not equivalent with only ~25% of the total amplitude associated with the fast phase. The decrease in the amplitude associated with the initial fast phase results because of the relatively weak ADP affinity for one of the Ncd heads in solution and previously proposed to be the head that initially collides with the MT (1) as well as the time domain used to capture both the fast and slow exponential phases. These results are consistent with rates reported previously for mantADP release upon MT collision and ATP-promoted head 2 mantADP release (Table S1) (1).

1. Foster KA, Mackey AT, Gilbert SP (2001) A mechanistic model for Ncd directionality. *J Biol Chem* 276(22):19259–19266.

**Table S1. Experimentally determined constants for the MT•Ncd ATPase**

| Reaction step                                          | Constants                                                                                                                                                                                                                                                                                           |
|--------------------------------------------------------|-----------------------------------------------------------------------------------------------------------------------------------------------------------------------------------------------------------------------------------------------------------------------------------------------------|
| mantATP binding following MT•Ncd association           | $k_{\max} = 4.4 \pm 0.2 \text{ s}^{-1}$<br>$k_{\text{off}} = 1.8 \pm 0.1 \text{ s}^{-1}$<br>$K_{1/2, \text{mantATP}} = 9.4 \pm 1.4 \text{ }\mu\text{M}$                                                                                                                                             |
| mantATP binding to the MT•Ncd complex<br>(from ref. 1) | $k_{\max} = 2.3 \pm 0.1 \text{ }\mu\text{M}^{-1}\cdot\text{s}^{-1}$<br>$k_{-1}$ not observed                                                                                                                                                                                                        |
| ATP binding (pulse-chase)                              | $K_1 = 0.14 \pm 0.03 \text{ }\mu\text{M}^{-1}$<br>$k_{+1'} = 81.3 \pm 2.6 \text{ s}^{-1}$<br>$K_1 k_{+1'} = 11.4 \pm 0.08 \text{ }\mu\text{M}^{-1}\cdot\text{s}^{-1}$<br>$K_{d, \text{ATP}} = 7.1 \text{ }\mu\text{M}$<br>$A_0 = 0.84 \pm 0.03 \text{ }\mu\text{M ADP}\cdot\text{P}_i$ per Ncd site |
| ATP hydrolysis (acid quench)                           | $K_{d, \text{ATP}} = 47 \pm 5.2 \text{ }\mu\text{M}$<br>$k_{\max} = 26 \pm 0.6 \text{ s}^{-1}$<br>$K_{d, \text{ATP}} = 7.2 \pm 0.9 \text{ }\mu\text{M}$<br>$A_0 = 1.09 \pm 0.04 \text{ }\mu\text{M ADP}\cdot\text{P}_i$ per Ncd site                                                                |
| MT•Ncd association (from ref. 1)                       | $K_{d, \text{ATP}} = 63.7 \pm 6 \text{ }\mu\text{M}$<br>$k_{\max} = 0.7 \pm 0.1 \text{ }\mu\text{M}^{-1}\cdot\text{s}^{-1}$<br>$k_{-1} = 2.7 \pm 0.6 \text{ s}^{-1}$                                                                                                                                |
| mantADP release from head 1 (from ref. 2)              | $k_{\max} = 17.8 \pm 1.6 \text{ s}^{-1}$                                                                                                                                                                                                                                                            |
| mantADP release from head 2 (from ref. 2)              | $K_{1/2, \text{MT}} = 2.2 \pm 2.0 \text{ }\mu\text{M}$<br>$k_{\max} = 1.4 \pm 0.02 \text{ s}^{-1}$                                                                                                                                                                                                  |
| Phosphate release following MT•Ncd association         | $K_{1/2, \text{ATP}} = 0.64 \pm 0.06 \text{ }\mu\text{M}$<br>$k_{\max} = 2.9 \pm 0.1 \text{ s}^{-1}$<br>$K_{1/2, \text{ATP}} = 16 \pm 1 \text{ }\mu\text{M}$                                                                                                                                        |
| Phosphate release from the MT•Ncd complex              | $A_{0, \max} = 5.7 \pm 0.25 \text{ }\mu\text{M P}_i$ (~1.1 $\text{P}_i$ /Ncd site)<br>$k_{\max} = 14.3 \pm 0.3 \text{ s}^{-1}$<br>$K_{1/2, \text{ATP}} = 23.3 \pm 2.3 \text{ }\mu\text{M}$                                                                                                          |
| ATP-promoted MT•Ncd dissociation (from ref. 1)         | $A_{0, \max} = 1.1 \pm 0.01 \text{ }\mu\text{M P}_i$ (~0.44 $\text{P}_i$ /Ncd site)<br>$k_{\max} = 13.1 \pm 0.6 \text{ s}^{-1}$<br>$K_{1/2, \text{ATP}} = 18.7 \pm 4.1 \text{ }\mu\text{M}$                                                                                                         |
| Steady-state parameters (from ref. 3)                  | $k_{\text{cat}} = 2.1 \pm 0.2 \text{ s}^{-1}$<br>$K_{m, \text{ATP}} = 23.1 \pm 1.5 \text{ }\mu\text{M}$<br>$K_{1/2, \text{MT}} = 18.3 \pm 5.1 \text{ }\mu\text{M}$                                                                                                                                  |

Errors are  $\pm$ SEM.

1. Foster KA, Gilbert SP (2000) Kinetic studies of dimeric Ncd: Evidence that Ncd is not processive. *Biochemistry* 39(7):1784–1791.
2. Foster KA, Mackey AT, Gilbert SP (2001) A mechanistic model for Ncd directionality. *J Biol Chem* 276(22):19259–19266.
3. Foster KA, Correia JJ, Gilbert SP (1998) Equilibrium binding studies of non-claret disjunctional protein (Ncd) reveal cooperative interactions between the motor domains. *J Biol Chem* 273(52):35307–35318.
